# Supplementary material for: Characterizing the intestinal chondroitin sulfate glycosaminoglycan sulfation signature in inflammatory bowel disease
Source: Research Square preprint supplement (doi:10.21203/rs.3.rs-3789026/v1), 2024-01-03
Supplement: Supplementary file 1 [file 2ce4a14bdc6d6f78abb902e6.pdf]

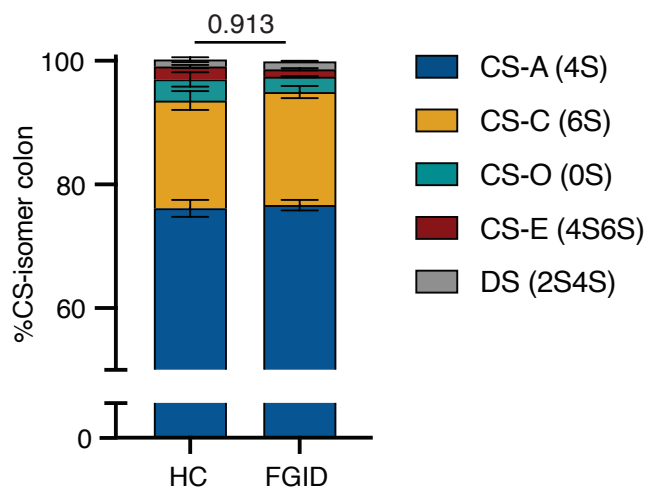

**Supplemental Figure 1.** CS/DS colon isomer composition in healthy endoscopy controls (HC, n=4) compared to patients with function gastrointestinal disease (FGID, n=9) who had some degree of symptomatology prompting endoscopy, but no gross or histologic changes.

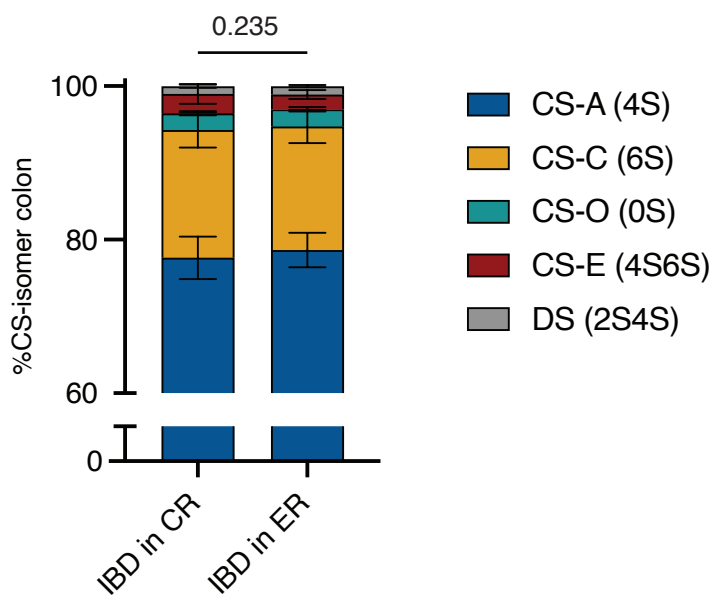

**Supplemental Figure 2.** CS/DS colon isomer composition in patients with IBD in clinical remission (IBD in CR, n=22) at follow up compared to patients in endoscopic remission (ER, n=14) at follow up.
